# Supplementary material for: Alterations of the Gut Microbiome and Metabolome in Patients with Proliferative Diabetic Retinopathy
Source: Research Square preprint supplement (doi:10.21203/rs.3.rs-131500/v1), 2020-12-21
Supplement: Supplementary file 1 [file b44d303f0ad1823e7370b77a.docx]

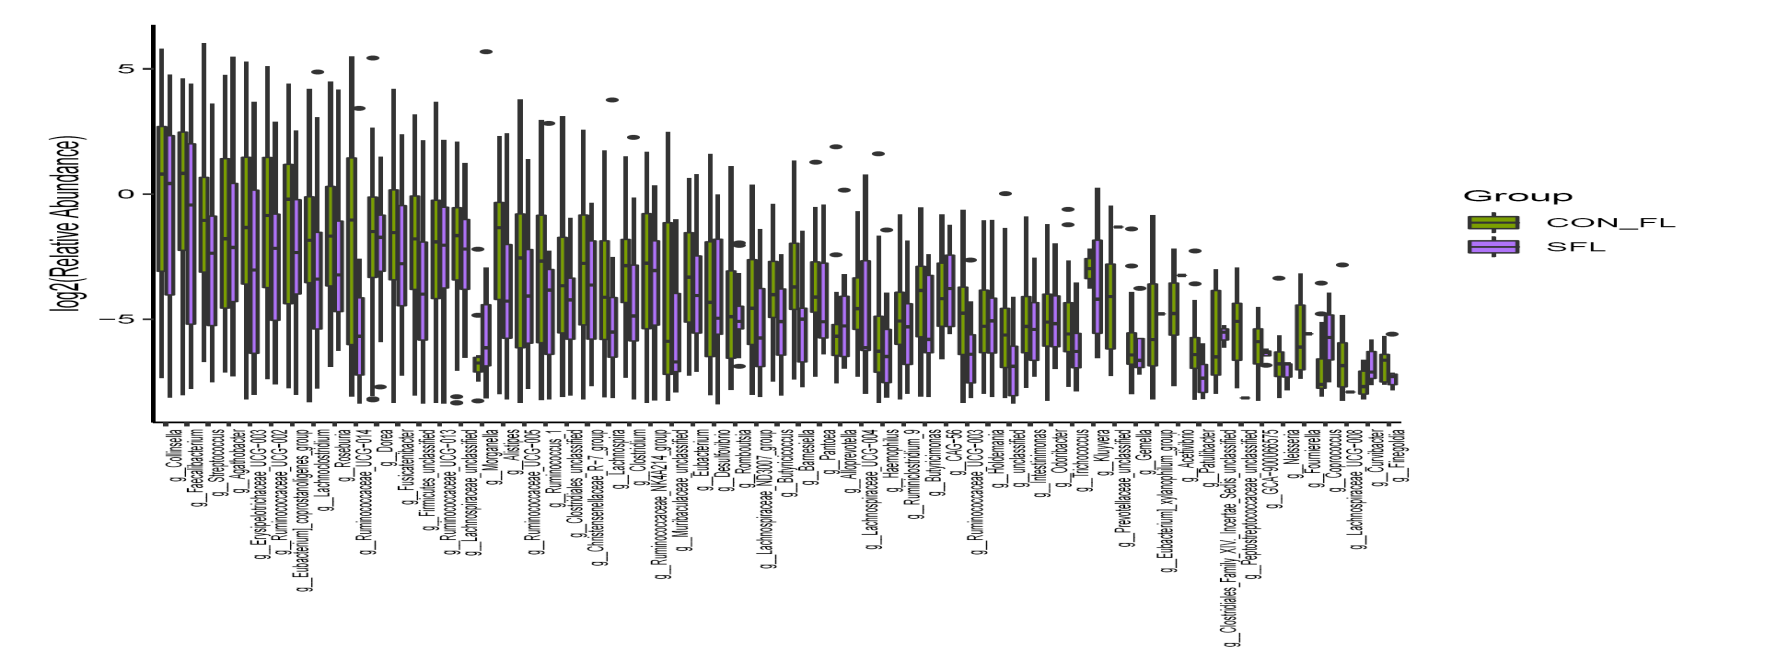

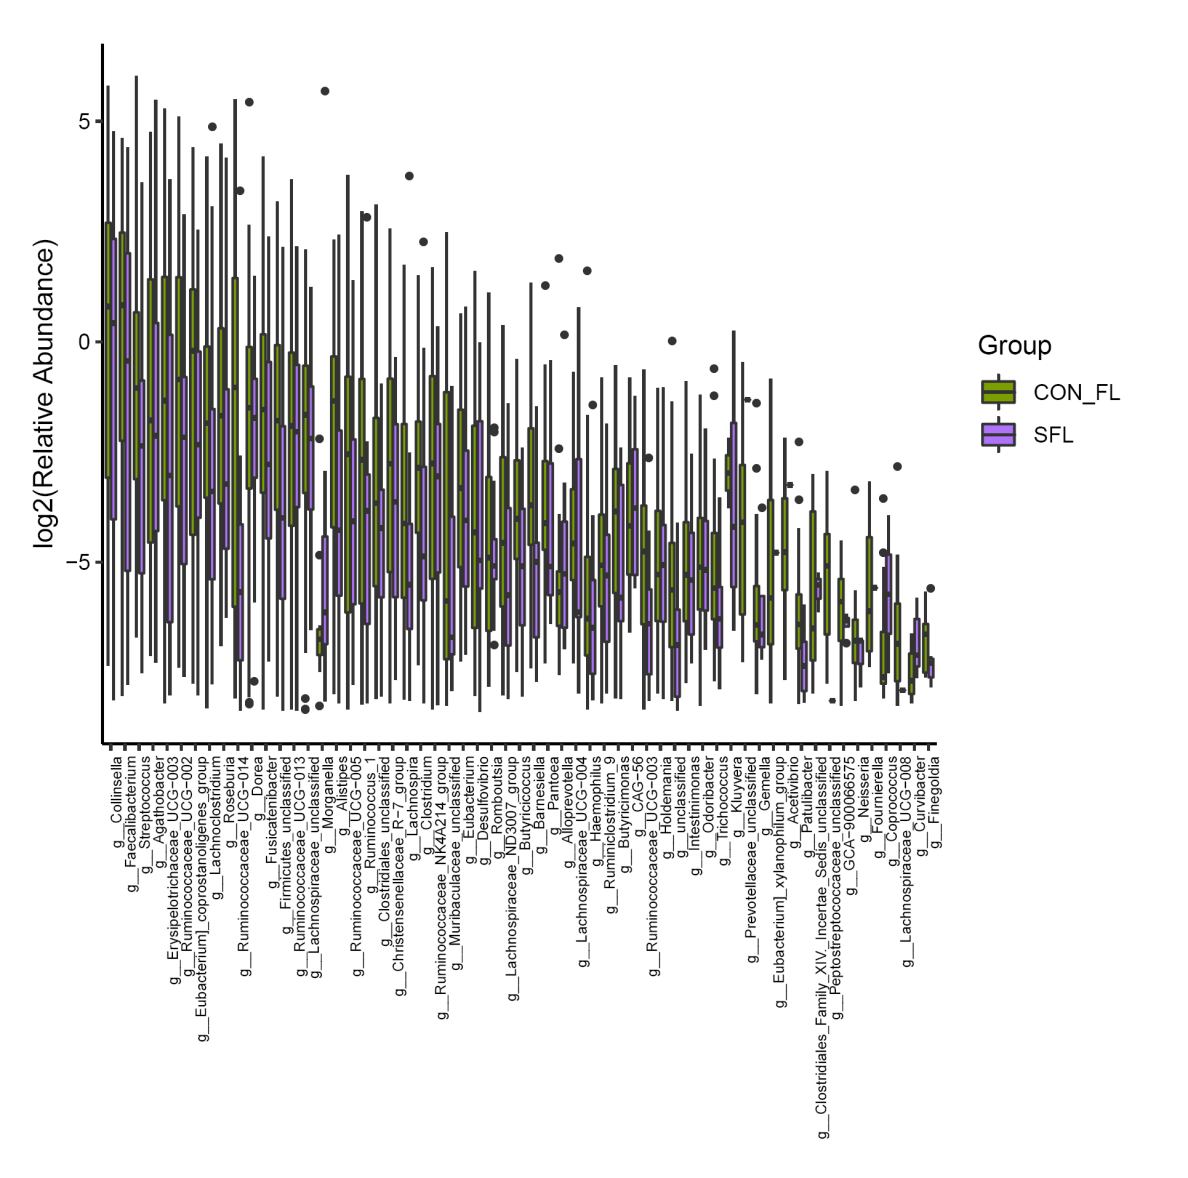

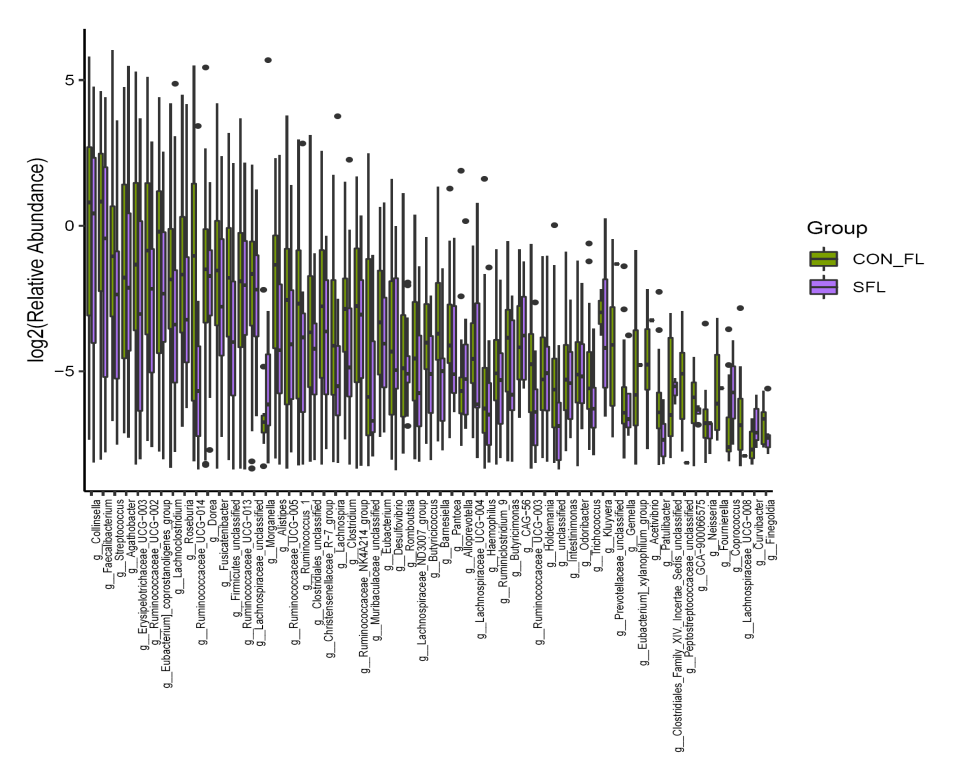

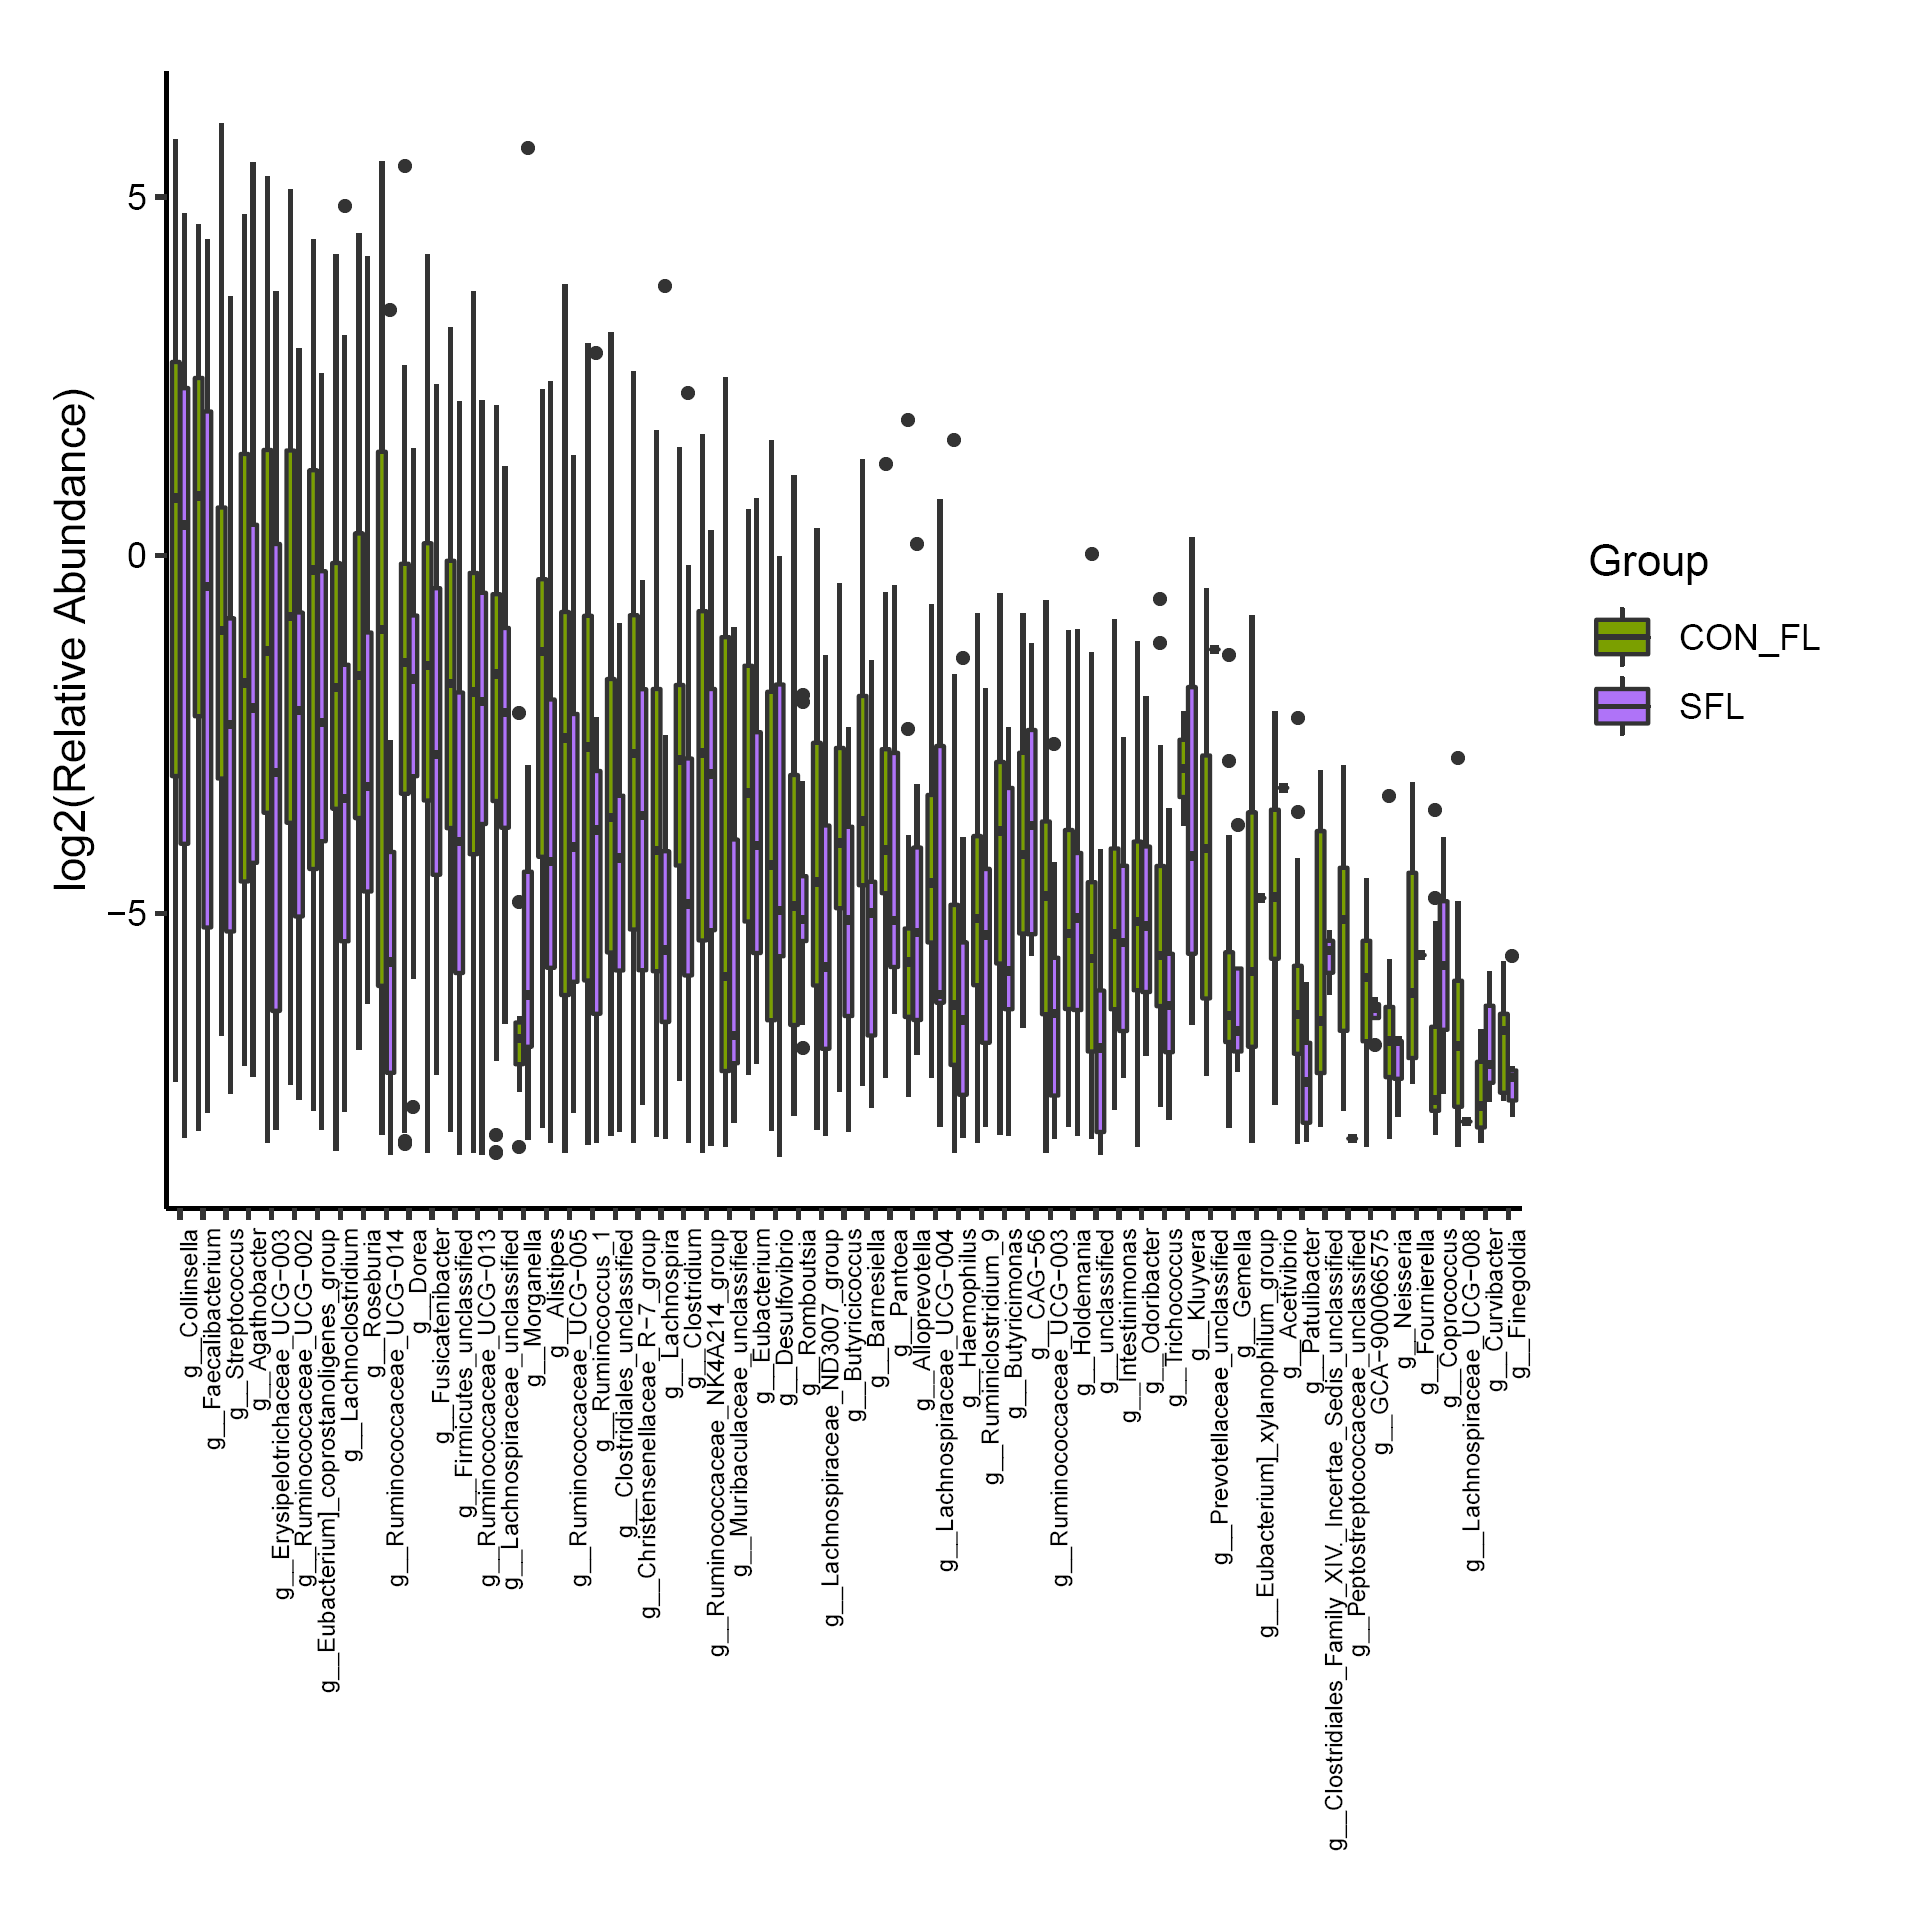


non-PDR

PDR

Fig. S1 The significant altered bacteria at genus level in proliferative diabetic retinopathy (PDR) patients


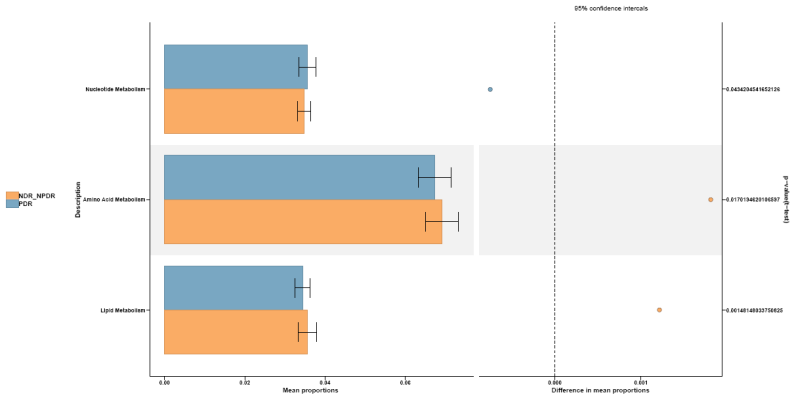


Nucleotide metabolism

Amino acid metabolism

Lipid metabolism

Difference in mean proportions

Mean proportions

0.02

0.04

0.06

0

0

0.001

95% confidence intervals


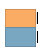


non-PDR


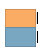


PDR

0.043

0.017

0.015

P-value


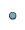

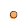

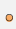


Fig. S2 The enriched pathways of significantly differential expressed metabolites between patients with and without proliferative diabetic retinopathy (PDR).


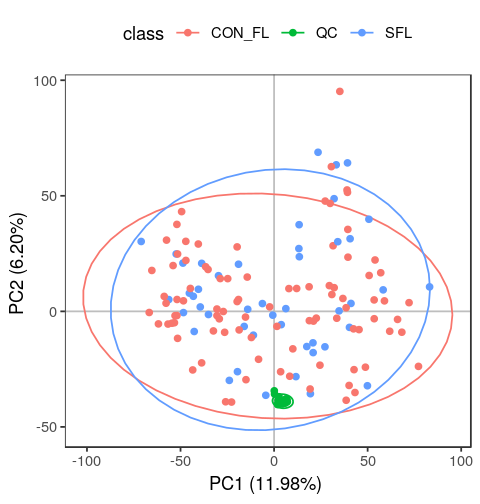

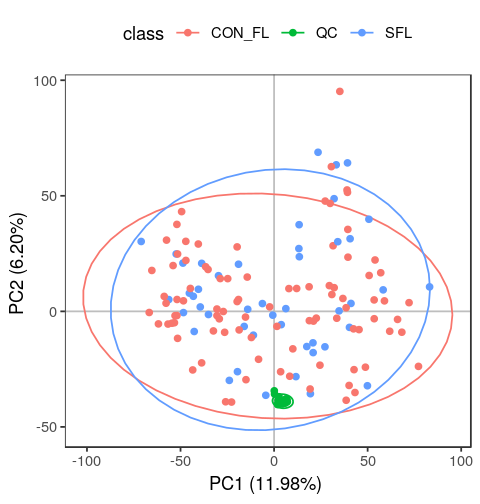

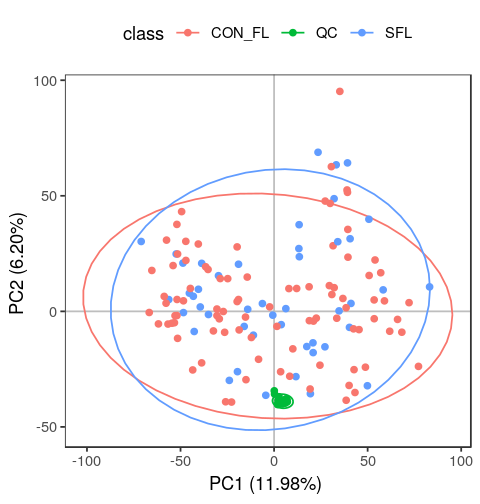

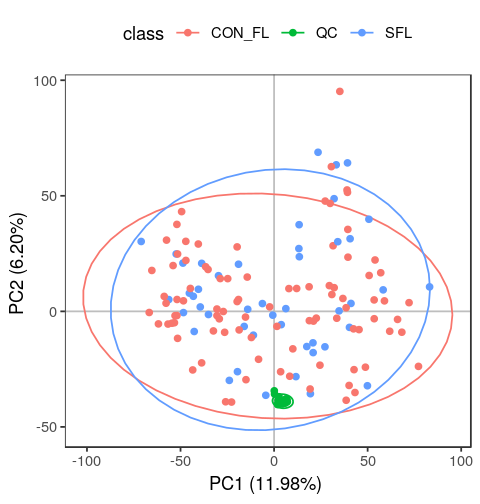

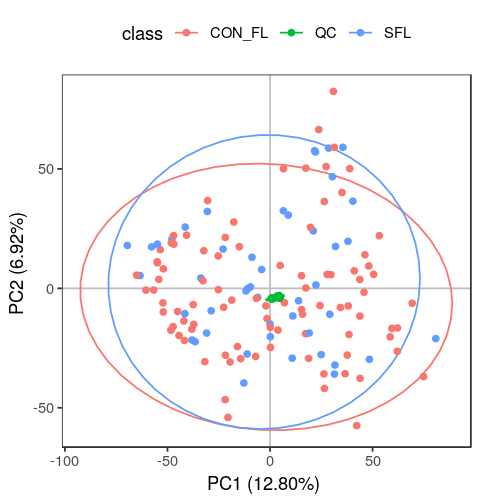


Positive

Negative

PDR

non-PDR

QC


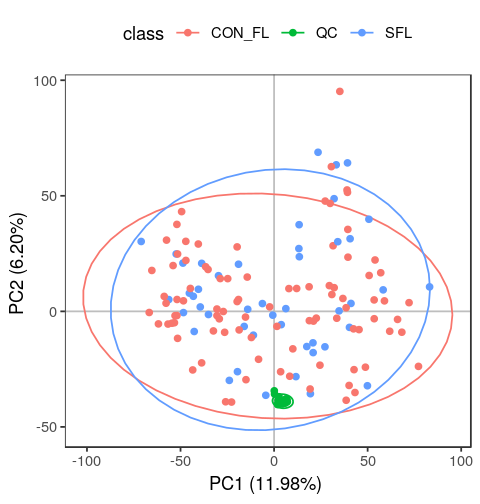

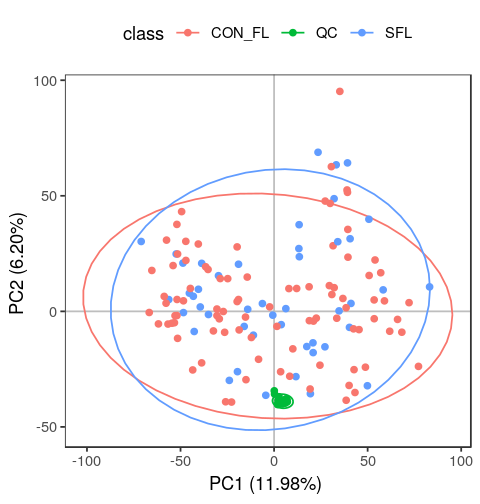

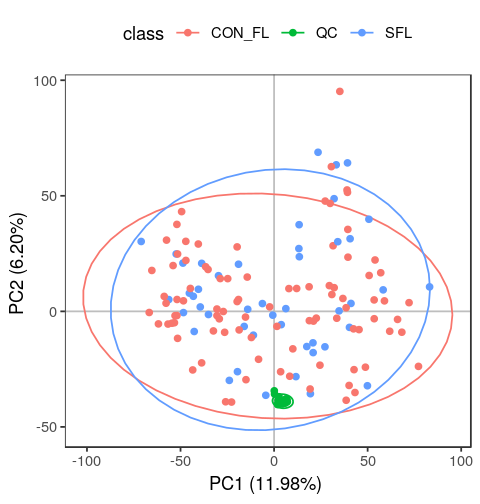


PDR

non-PDR

QC

Fig. S2 Principal component analysis (PCA) score plots of metabolomics data. PDR, proliferative diabetic retinopathy; QC, quality control.
